# Supplementary material for: Neural stem cell neural differentiation in 3D extracellular matrix and endoplasmic reticulum stress microenvironment
Source: Royal Society of Chemistry journal article supplement (doi:10.1039/c6ra04370d), 2016-01-01
Supplement: c6ra04370d1.pdf [file c6ra04370d1.pdf]

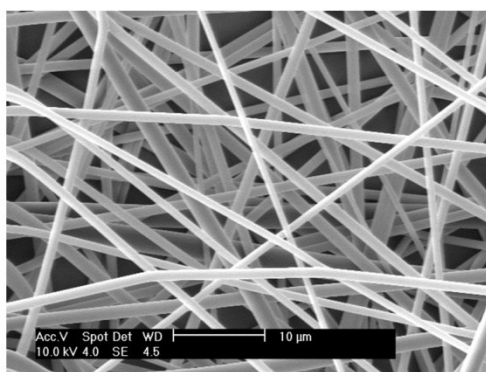

Figure S1. Scanning electron microscopy for nanomatrix. The image with random nano-scale polymer fibers was provided by the manufactory.

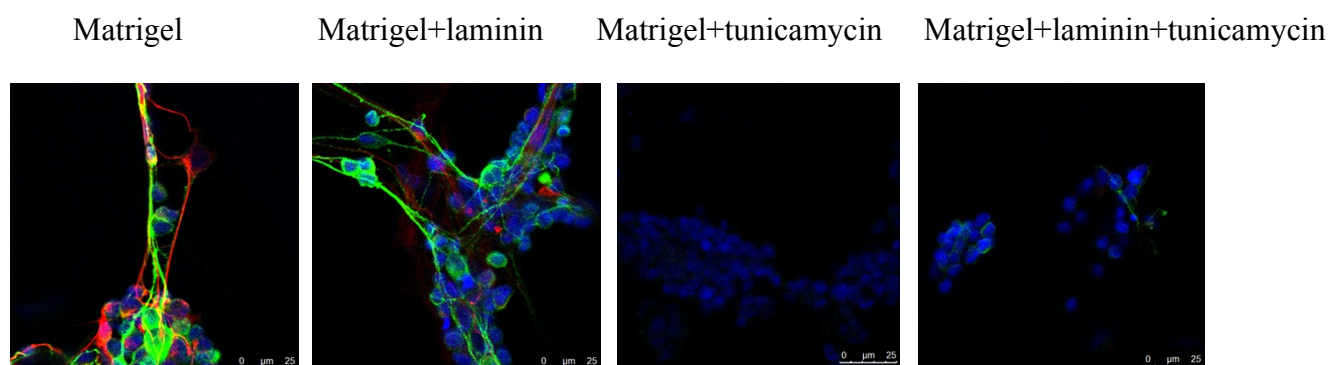

Figure S2. Differentiation of NSCs in the 3D ECM upon 3 d tunicamycin exposure conditions was examined. NSCs in the 3D ECM were exposed to tunicamycin for 3 d, then immunofluorescent staining for nestin (red) and MAP2 (green) was performed. Scale bars indicate 25  $\mu\text{m}$ .
